# Supplementary material for: Administration of Lactobacillus salivarius LI01 or Pediococcus pentosaceus LI05 prevents CCl4-induced liver cirrhosis by protecting the intestinal barrier in rats
Source: PubMed Central journal article supplement (PMC5537250; doi:10.1038/s41598-017-07091-1), 2017-07-31

# Administration of *Lactobacillus salivarius* LI01 or *Pediococcus pentosaceus* LI05

## prevents CCl<sub>4</sub>-induced liver cirrhosis by protecting the intestinal barrier in rats

Ding Shi<sup>a,1</sup>, Longxian Lv<sup>a,1</sup>, Daiqiong Fang<sup>a,1</sup>, Wenrui Wu<sup>a,1</sup>, Chenxia Hu<sup>a,1</sup>, Lichen Xu<sup>a,1</sup>, Yanfei Chen<sup>a</sup>, Jing Guo<sup>a</sup>, Xinjun Hu<sup>a</sup>, Ang Li<sup>a</sup>, Feifei Guo<sup>a</sup>, Jianzhong Ye<sup>a</sup>, Yating Li<sup>a</sup>, Dewi Andayani<sup>a</sup>, Lanjuan Li<sup>a\*</sup>

<sup>a</sup>State Key Laboratory for Diagnosis and Treatment of Infectious Diseases, Collaborative Innovation Centre for Diagnosis and Treatment of Infectious Diseases, the First Affiliated Hospital, College of Medicine, Zhejiang University, 310003 Hangzhou, China.

<sup>1</sup> Ding Shi, Longxian Lv, Daiqiong Fang, Wenrui Wu, Chenxia Hu, and Lichen Xu contributed equally to this work.

### Supplementary materials

#### Supplementary Table. 1. PCR primer sets for RT-PCR analysis of the indicated genes.

| Gene                | Forward Sequence (5'-3') | Reverse Sequence (5'-3') | Product Length (bp) |
|---------------------|--------------------------|--------------------------|---------------------|
| $\beta$ -defensin-1 | GCTGCCCATCTCATACCAA      | ACAATCCCTTGCTGTCCTTT     | 110                 |
| ZO-1                | TGAGAAGCAGACACCCACTC     | TTGGCAGAACACCATCAGAA     | 104                 |
| TGF- $\beta$ 1      | ATTCTGGCGTTACCTTGG       | AGCCCTGTATTCCGTCTCCT     | 120                 |
| Timp-1              | CTGGTTCCTGGCATAATCT      | ATCGCTCTGGTAGCCCTTCT     | 183                 |
| Colla1              | ATCTCCTGGTGCTGATGGAC     | GCCTCTTTCTCCTCTCTGACC    | 109                 |
| TNF- $\alpha$       | CAGGTTCCGTCCCTCTCATA     | TGCCAGTCCACATCTCG        | 100                 |
| TLR4                | CCCTGCCACCATTACAGTT      | ATCAGAGTCCCAGCCAGATG     | 100                 |
| TLR2                | AAACTGTGTTTCGTGCTTTCTG   | GCGTCATTGTTCTCGTCAAA     | 100                 |
| TLR5                | GGCTCAACCAAACCAATGTC     | TCCTCTTCATCGCAGTCCTT     | 121                 |
| TLR9                | GTCCCAGCCTTCTTTGCTCT     | CGTCAGGTTTCATCACAATGG    | 111                 |
| INOS-2              | ACCTTTATGTTTGTGGCGATG    | TCAACCTGCTCCTCACTCAA     | 100                 |
| IL-10               | GAAGCTGAAGACCCTCTGGA     | TGGCCTGTAGACACCTTTG      | 131                 |
| IL-6                | AGTTGCCCTTCTGGGACTGA     | ACTGGTCTGTTGTGGGTGGT     | 102                 |
| IL-17a              | GCGTCCTAACAGAGACCTGA     | AGGGTGAAGGCAGACAAT       | 148                 |

**Supplementary Table. 2. Histological scores of the inflammatory cell, goblet cell, mucosa, villi architecture and crypts.**

| Group   | Inflammatory Cell       | Goblet cell             | Mucosa                  | Crypts                  | Villi architecture       | Total scores             |
|---------|-------------------------|-------------------------|-------------------------|-------------------------|--------------------------|--------------------------|
| Control | 0.3 ± 0.2 <sup>**</sup> | 0.6 ± 0.2 <sup>**</sup> | 0.4 ± 0.2 <sup>**</sup> | 0 (0, 1.0) <sup>*</sup> | 0 (0, 1.0) <sup>**</sup> | 1.6 ± 0.3 <sup>**</sup>  |
| MY      | 2.4 ± 0.3               | 1.7 ± 0.2               | 1.6 ± 0.3               | 3.0 (0, 4.0)            | 3.0 (0, 3.0)             | 10.0 ± 1.3               |
| ZCS     | 2.4 ± 0.3               | 2.1 ± 0.2               | 1.9 ± 0.1               | 1.5 (0, 3.75)           | 1.5 (0, 3.0)             | 9.6 ± 1.2                |
| LI01    | 1.7 ± 0.2 <sup>*</sup>  | 1.7 ± 0.2               | 1.8 ± 0.2               | 0 (0, 3.0)              | 0 (0, 3.0) <sup>*</sup>  | 7.8 ± 0.9                |
| LI05    | 1.4 ± 0.3 <sup>*</sup>  | 1.6 ± 0.2               | 1.7 ± 0.2               | 0 (0, 3.0)              | 0 (0, 3.0) <sup>*</sup>  | 7.0 ± 0.9 <sup>*</sup>   |
| LGG     | 2.4 ± 0.2               | 1.6 ± 0.3               | 2.9 ± 0.2               | 3.0 (0, 3.0)            | 1.5 (0, 3.0)             | 10.3 ± 0.9 <sup>**</sup> |
| NS      | 2.6 ± 0.4               | 1.7 ± 0.3               | 2.1 ± 0.3               | 3.0 (0, 3.0)            | 3.0 (3.0, 3.0)           | 11.1 ± 0.9               |

All data are given as the mean ± SEM or median (25th, 75th percentiles). <sup>\*</sup>P < 0.05, <sup>\*\*</sup>P < 0.01 vs. normal saline-treated cirrhotic rats in the NS group.

**Supplementary Table. 3. Comparison of diversity estimation of the 16S rRNA gene library at 97% similarity from the pyrosequencing analysis**

| Diversity index | Control       | MY            | ZCS                      | LI01                     | LI05                     | LGG           | NS            |
|-----------------|---------------|---------------|--------------------------|--------------------------|--------------------------|---------------|---------------|
| OTUs            | 1918 ± 228    | 1969 ± 261    | 2223 ± 155 <sup>**</sup> | 2322 ± 200 <sup>**</sup> | 2197 ± 213 <sup>**</sup> | 1963 ± 204    | 1909 ± 183    |
| Chao1           | 2956 ± 345    | 3237 ± 339    | 3679 ± 212 <sup>**</sup> | 3930 ± 273 <sup>**</sup> | 3695 ± 350 <sup>**</sup> | 3266 ± 288    | 3032 ± 280    |
| Shannon         | 8.23 ± 0.30   | 8.17 ± 0.47   | 8.46 ± 0.41              | 8.40 ± 0.35              | 8.34 ± 0.46              | 8.24 ± 0.35   | 8.33 ± 0.17   |
| Simpson         | 0.986 ± 0.005 | 0.980 ± 0.019 | 0.985 ± 0.001            | 0.985 ± 0.010            | 0.982 ± 0.002            | 0.987 ± 0.004 | 0.988 ± 0.003 |

All data are given as the mean ± SEM. <sup>\*\*</sup>P < 0.01 vs. normal saline-treated cirrhotic rats in the NS group. OTUs: operational taxonomic units.

**Supplementary Table. 4. Clustering of the gut microbiota from different probiotic groups**

| Unifrac distance matrix used for ANOSIM | Group | Hypothesis       | P-value | R-value |
|-----------------------------------------|-------|------------------|---------|---------|
| Unweighted                              | LI01  | LI01 vs. Control | 0.001** | 0.99    |
|                                         |       | LI01 vs. NS      | 0.001** | 0.80    |
|                                         |       | LI01 vs. MY      | 0.001** | 0.52    |
|                                         |       | LI01 vs. ZCS     | 0.002** | 0.42    |
|                                         |       | LI01 vs. LGG     | 0.001** | 0.67    |
|                                         |       | LI01 vs. LI05    | 0.002** | 0.33    |
| Weighted                                | LI01  | LI01 vs. Control | 0.001** | 0.55    |
|                                         |       | LI01 vs. NS      | 0.001** | 0.48    |
|                                         |       | LI01 vs. MY      | 0.016*  | 0.29    |
|                                         |       | LI01 vs. ZCS     | 0.001** | 0.45    |
|                                         |       | LI01 vs. LGG     | 0.001** | 0.43    |
|                                         |       | LI01 vs. LI05    | 0.008** | 0.21    |
| Unweighted                              | LI05  | LI05 vs. Control | 0.001** | 0.86    |
|                                         |       | LI05 vs. NS      | 0.001** | 0.81    |
|                                         |       | LI05 vs. MY      | 0.008** | 0.30    |
|                                         |       | LI05 vs. ZCS     | 0.003** | 0.32    |
|                                         |       | LI05 vs. LGG     | 0.003** | 0.37    |
| Weighted                                | LI05  | LI05 vs. Control | 0.001** | 0.31    |
|                                         |       | LI05 vs. NS      | 0.005** | 0.28    |
|                                         |       | LI05 vs. MY      | 0.543   | -0.03   |
|                                         |       | LI05 vs. ZCS     | 0.05*   | 0.17    |
|                                         |       | LI05 vs. LGG     | 0.139   | 0.08    |
| Unweighted                              | NS    | NS vs. Control   | 0.001** | 0.82    |
|                                         |       | NS vs. MY        | 0.002** | 0.62    |
|                                         |       | NS vs. LGG       | 0.002** | 0.32    |
|                                         |       | NS vs. ZCS       | 0.001** | 0.72    |
| Weighted                                | NS    | NS vs. Control   | 0.002** | 0.39    |
|                                         |       | NS vs. MY        | 0.095   | 0.127   |
|                                         |       | NS vs. LGG       | 0.319   | 0.02    |

|  |  |            |         |      |
|--|--|------------|---------|------|
|  |  | NS vs. ZCS | 0.001** | 0.63 |
|--|--|------------|---------|------|

Statistical tests between different probiotic groups based on weighted and unweighted UniFrac distance matrices. P-values < 0.05 are designated with \*, <0.01 are designated with \*\*. (ANOSIM with 999 permutations)

**Supplementary Figure. 1.** A PCoA plot of the microbiota based on the results of the weighted UniFrac metric. Each symbol represents a sample; the variance explained by the PCs is indicated on the axes.

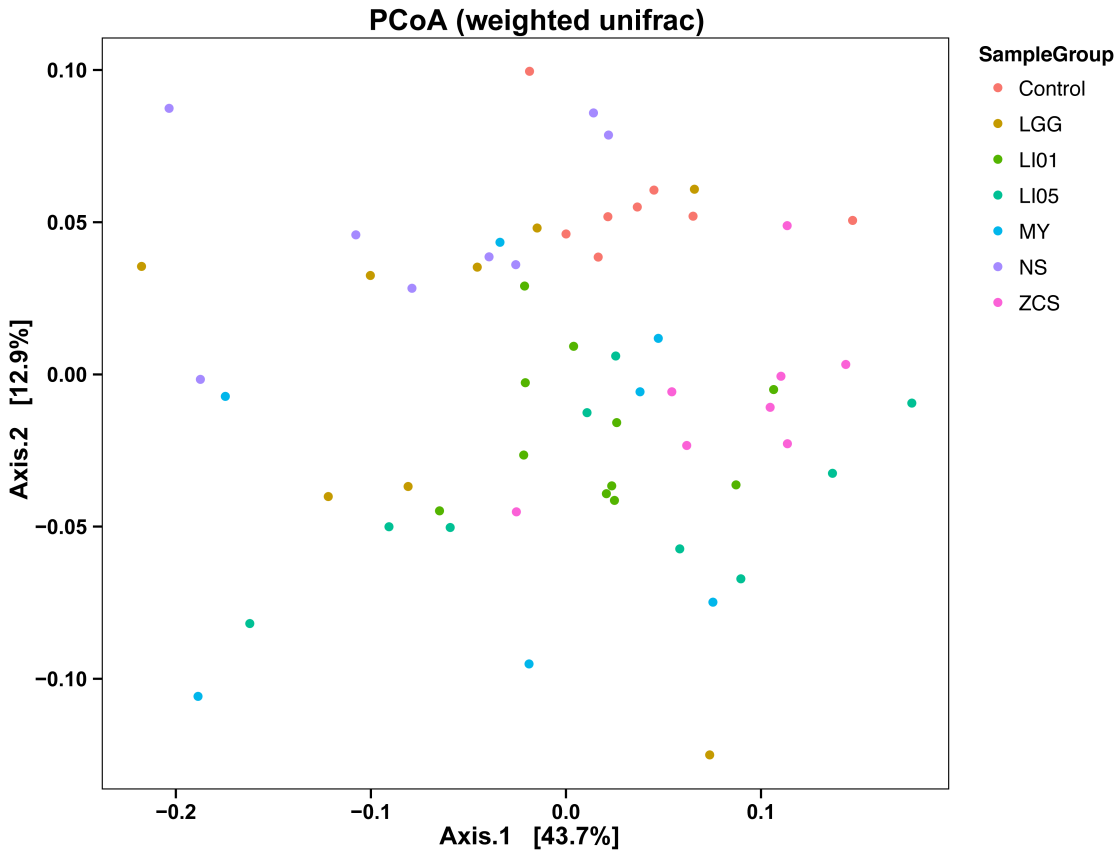

Supplement: 41598_2017_7091_MOESM1_ESM.pdf [file 41598_2017_7091_MOESM1_ESM.pdf]
